# Supplementary material for: Crystal structure of the inclusion complex of cholesterol in β-cyclodextrin and molecular dynamics studies
Source: PubMed Central journal article supplement (PMC5905284; doi:10.3762/bjoc.14.69), 2018-04-11
Supplement: Beilstein_J_Org_Chem-14-838-s001.pdf [file Beilstein_J_Org_Chem-14-838-s001.pdf]

## **Supporting Information**

**for**

# **Crystal structure of the inclusion complex of cholesterol in $\beta$ -cyclodextrin and molecular dynamics studies**

Elias Christoforides, Andreas Papaioannou and Kostas Bethanis\*

Address: <sup>1</sup>Department of Biotechnology, Agricultural University of Athens, 75 Iera Odos, Athens 11855, Greece

Email: Kostas Bethanis - kbeth@aua.gr

\*Corresponding author

**Geometrical characteristics of the crystal structure of the  
CHL/ $\beta$ CD inclusion compound.**

**Table S1: a.** Hydrogen bonds network of the crystal structure

|                                                   |             | Distance (Å) | Symmetry operation |
|---------------------------------------------------|-------------|--------------|--------------------|
| <i>Between water molecules*</i>                   |             |              |                    |
| 1                                                 | OW1...OW2   | 2.782(15)    | (x, y, z)          |
| 2                                                 | OW1...OW35  | 2.56(5)      | (x, -1+y, z)       |
| 3                                                 | OW2...OW26  | 2.58(3)      | (x, y, z)          |
| 4                                                 | OW3...OW14  | 2.786(18)    | (x, y, z)          |
| 5                                                 | OW4...OW6   | 2.784(17)    | (x, y, z)          |
| 6                                                 | OW7...OW11  | 2.898(18)    | (x, y, z)          |
| 7                                                 | OW7...OW18  | 2.86(2)      | (x, y, z)          |
| 8                                                 | OW7...OW32  | 2.74(3)      | (x, y, z)          |
| 9                                                 | OW8...OW13  | 2.789(17)    | (x, y, z)          |
| 10                                                | OW9...OW16  | 2.76(2)      | (x, y, 1+z)        |
| 11                                                | OW9...OW19  | 2.86(2)      | (x, y, z)          |
| 12                                                | OW9...OW33  | 2.71(8)      | (x, y, z)          |
| 13                                                | OW11...OW14 | 2.846(18)    | (x, y, z)          |
| 14                                                | OW14...OW19 | 2.78(2)      | (x, y, z)          |
| 15                                                | OW16...OW29 | 2.59(7)      | (x, y, z)          |
| 16                                                | OW1...OW15  | 2.849(18)    | (x, -1+y, z)       |
| 17                                                | OW2...OW10  | 2.747(19)    | (x, y, z)          |
| <i>Between water molecules and the two hosts*</i> |             |              |                    |
| 1                                                 | OW6...O24A  | 2.645(15)    | (-1+x, -1+y, z)    |
| 2                                                 | OW13...O63A | 2.69(2)      | (-1+x, -1+y, -1+z) |
| 3                                                 | OW13...O61B | 2.669(16)    | (x, y, z)          |
| 4                                                 | OW16...O62B | 2.75(3)      | (x, y, z)          |
| 5                                                 | OW1...O67B  | 2.707(15)    | (x, -1+y, z)       |
| 6                                                 | OW10...O23B | 2.776(17)    | (x, y, z)          |
| 7                                                 | OW12...O25A | 2.738(16)    | (-1+x, y, z)       |
| 8                                                 | OW12...O37A | 2.884(15)    | (x, y, z)          |
| 9                                                 | OW31...O32B | 2.92(6)      | (x, y, z)          |
| 10                                                | OW34...O32B | 2.69(13)     | (x, y, z)          |
| 11                                                | OW36...O22B | 2.68(7)      | (x, y, z)          |
| <i>Between the two hosts</i>                      |             |              |                    |
| 1                                                 | O54A...O62D | 2.81(2)      | (1+x, 1+y, 1+z)    |
| 2                                                 | O63A...O52B | 2.794(19)    | (1+x, 1+y, 1+z)    |
| 3                                                 | O63A...O62D | 2.89(2)      | (1+x, 1+y, 1+z)    |

**b. Host–guest intermolecular interactions**

|                                |                                 | Distance<br>(Å) | Type of<br>interaction<br>** |
|--------------------------------|---------------------------------|-----------------|------------------------------|
| <b>Ring A of CHL</b>           | <b>hostA</b>                    |                 |                              |
| C1-H1A                         | H52A-C52A                       | 2.119(4)        | 1                            |
| C1-H1B                         | H52A-C53A                       | 2.200(3)        | 1                            |
| C1-H1B                         | H53A-C53A                       | 2.152(4)        | 1                            |
| C2-H2A                         | O63C (sof = 0.4)                | 2.50(3)         | 2                            |
| <b>Methyl C19 of CHL</b>       | <b>hostA</b>                    |                 |                              |
| C19-H19C                       | H53A-C53A                       | 2.295(5)        | 1                            |
| C19-H19C                       | H54A-C54A                       | 2.247(4)        | 1                            |
| C19-H19A                       | H54A-C54A                       | 2.394(5)        | 1                            |
| <b>Ring B of CHL</b>           | <b>hostA</b>                    |                 |                              |
| C6-H6                          | H57A-C57A                       | 2.313(5)        | 1                            |
| C6-H6                          | H56A-C56A                       | 2.267(4)        | 1                            |
| C7-H7A                         | H37A-C37A                       | 2.362(6)        | 1                            |
| C7-H7B                         | H36A-C36A                       | 2.225(5)        | 1                            |
| C7-H7B                         | O46A                            | 2.596(10)       | 2                            |
| <b>Methyl C21 of CHL</b>       | <b>hostB</b>                    |                 |                              |
| C21-H21B                       | H36C-C36B                       | 2.376(4)        | 1                            |
| <b>Aliphatic chain of CHL</b>  |                                 |                 |                              |
| C24-H24E                       | OW29 (sof = 0.2)                | 1.99(7)         | 2                            |
| C24-H24B                       | OW29 (sof = 0.2)                | 2.61(7)         | 2                            |
| <b>Isopropyl group of CHL*</b> |                                 |                 |                              |
| C26-H26E                       | O61D (hostB; sof = 0.2)         | 2.027(4)        | 2                            |
| C26-H26E                       | OW33 (x, -1+y, -1+z; sof = 0.2) | 1.781(4)        | 2                            |
| C26-H26F                       | O66A (hostA; 1+x, y, -1+z)      | 2.648(5)        | 2                            |
| C26-H26G                       | OW29 (x, -1+y, -1+z; sof = 0.2) | 2.041(3)        | 2                            |
| C26-H26G                       | O62B (x, -1+y, -1+z; sof = 0.4) | 2.702(5)        | 2                            |
| C27-H27D                       | O61D (hostB; sof = 0.2)         | 2.452(5)        | 2                            |

(\*) H-atoms belonging to the disorder water molecules were not placed during refinement.

(\*\*) Type 1: H...H closed shell interaction; Type 2: C–H...O interaction

**Table S2:** Conformation characteristics of the host molecules of cholesterol/ $\beta$ -CD inclusion compound.

|              | $D_K(\text{\AA})$ | $D(\text{\AA})$ | $\Phi(^{\circ})$ | $d(\text{\AA})$ | $\tau(^{\circ})$ | $t(^{\circ})$ | C         |
|--------------|-------------------|-----------------|------------------|-----------------|------------------|---------------|-----------|
| <b>hostA</b> |                   |                 |                  |                 |                  |               |           |
| $n = 1$      | 4.932(7)          | 4.343(9)        | 130.08(11)       | -0.01129(3)     | +6.616(19)       | -63.42(13)    | <i>gg</i> |
| $n = 2$      | 5.121(11)         | 4.369(7)        | 127.31(12)       | -0.006483(15)   | +2.491(7)        | -68.64(10)    | <i>gg</i> |
| $n = 3$      | 5.147(11)         | 4.282(8)        | 126.44(11)       | 0.004086(9)     | +8.62(3)         | -63.40(14)    | <i>gg</i> |
|              |                   |                 |                  |                 |                  | 77.21(14)     | <i>gt</i> |
| $n = 4$      | 4.908(8)          | 4.546(10)       | 130.91(11)       | 0.002920(7)     | +3.106(9)        | -67.08(14)    | <i>gg</i> |
| $n = 5$      | 4.962(9)          | 4.267(8)        | 131.01(11)       | 0.006961(16)    | +12.29(3)        | -64.10(16)    | <i>gg</i> |
| $n = 6$      | 5.261(11)         | 4.340(7)        | 123.13(12)       | -0.02692(6)     | +8.46(3)         | -66.02(17)    | <i>gg</i> |
| $n = 7$      | 4.966(9)          | 4.49(1)         | 131.09(11)       | 0.03072(7)      | +7.96(2)         | -62.40(12)    | <i>gg</i> |
| <b>hostB</b> |                   |                 |                  |                 |                  |               |           |
| $n = 1$      | 4.930(9)          | 4.374(8)        | 130.95(12)       | 0.002143(5)     | +5.420(15)       | -54.32(9)     | <i>gg</i> |
|              |                   |                 |                  |                 |                  | 81.04(11)     | <i>gt</i> |
| $n = 2$      | 5.257(11)         | 4.229(7)        | 123.02(11)       | 0.01677(4)      | +8.60(3)         | 47.69(9)      | <i>gt</i> |
|              |                   |                 |                  |                 |                  | -63.27(13)    | <i>gg</i> |
| $n = 3$      | 4.983(9)          | 4.465(9)        | 130.29(11)       | -0.01739(4)     | +6.50(2)         | -68.81(13)    | <i>gg</i> |
| $n = 4$      | 4.834(8)          | 4.343(9)        | 132.62(11)       | 0.000947(2)     | +12.05(3)        | -67.03(16)    | <i>gg</i> |
| $n = 5$      | 5.145(10)         | 4.380(7)        | 125.50(12)       | 0.006105(14)    | +9.92(3)         | -66.65(17)    | <i>gg</i> |
| $n = 6$      | 5.154(11)         | 4.276(8)        | 126.47(12)       | 0.005668(13)    | +10.66(3)        | -65.12(13)    | <i>gg</i> |
| $n = 7$      | 4.898(8)          | 4.492(10)       | 131.14(10)       | -0.01424(3)     | +6.323(19)       | -64.31(14)    | <i>gg</i> |

$D_K(\text{\AA}) = KA \dots O4nA$ ;  $D(\text{\AA}) = O4n \dots O4(n+1)$ ;  $\Phi(^{\circ}) = O4(n-1) \dots O4n \dots O4(n+1)$  angles;  $d(\text{\AA})$  = deviations of the  $O4n$  atoms from their least squares plane ;  $\tau(^{\circ})$  = tilt angles between the optimum  $O4n$  plane and the mean planes of the  $O4(n-1)$ ,  $C1n$ ,  $C4n$  and  $O4n$  atoms;  $t(^{\circ}) = O5n-C5n-C6n-O6n$  torsion angles; C = conformation of the primary hydroxyl groups.
